# Supplementary material for: Inter-rater reliability of the extended Composite Quality Score (CQS-2)
Source: Front Med (Lausanne). 2023 Aug 17;10:1201517. doi: 10.3389/fmed.2023.1201517 (PMC10469905; doi:10.3389/fmed.2023.1201517)
Supplement: Supplementary file 1 [file Table_1.xls]

## Sheet: Sheet1
Inter-rater reliability of the extended Composite Quality Score (CQS-2)
[Section 1] List of selected trial reports
Trial ID	Field of medical research	Article reference
1	Dentistry	Ballikaya E, Ünverdi GE, Cehreli ZC. Management of initial carious lesions of hypomineralized molars (MIH) with silver diamine fluoride or silver-modified atraumatic restorative treatment (SMART): 1-year results of a prospective, randomized clinical trial. Clin Oral Investig. 2022 Feb;26(2):2197-2205. doi: 10.1007/s00784-021-04236-5. Epub 2021 Nov 6. PMID: 34743243; PMCID: PMC8572062.
2	Internal medicine	Hasan ZT, Atrakji DMQYMAA, Mehuaiden DAK. The Effect of Melatonin on Thrombosis, Sepsis and Mortality Rate in COVID-19 Patients. Int J Infect Dis. 2022 Jan;114:79-84. doi: 10.1016/j.ijid.2021.10.012. Epub 2021 Oct 12. PMID: 34653660; PMCID: PMC8506572.
3	Surgery	Solakoglu Ö, Steinbach B, Götz W, Heydecke G, Schwarzenbach H. Characterization of circulating molecules and activities in plasma of patients after allogeneic and autologous intraoral bone grafting procedures: a prospective randomized controlled clinical trial in humans. BMC Oral Health. 2022 Jan 30;22(1):24. doi: 10.1186/s12903-021-02036-7. PMID: 35094679; PMCID: PMC8802434.
4	Psychotherapy	Abbar M, Demattei C, El-Hage W, Llorca PM, Samalin L, Demaricourt P, Gaillard R, Courtet P, Vaiva G, Gorwood P, Fabbro P, Jollant F. Ketamine for the acute treatment of severe suicidal ideation: double blind, randomised placebo controlled trial. BMJ. 2022 Feb 2;376:e067194. doi: 10.1136/bmj-2021-067194. PMID: 35110300; PMCID: PMC8808464.
5	Surgery	Subramaniam K, Esper SA, Mallikarjun K, Dickson A, Ruppert DrPH K, Drabek T, Wong H, Holder-Murray J. The Effect of Scheduled Intravenous Acetaminophen in an Enhanced Recovery Protocol Pathway in Patients Undergoing Major Abdominal Procedures: A Prospective, Randomized, and Placebo-Controlled Clinical Trial. Pain Med. 2022 Jan 3;23(1):10-18. doi: 10.1093/pm/pnab272. PMID: 34498068; PMCID: PMC9019…
6	Ophthalmology	Lv Z, Ma K. A Prospective, Randomized, Double-Masked Controlled Clinical Trial of Postoperative Pain after Transepithelial Photorefractive Keratectomy (Trans-PRK). J Healthc Eng. 2022 Apr 21;2022:2718785. doi: 10.1155/2022/2718785. PMID: 35494521; PMCID: PMC9050261.
7	Surgery	Risse J, Szeder K, Schubert AK, Wiesmann T, Dinges HC, Feldmann C, Wulf H, Meggiolaro KM. Comparison of left double lumen tube and y-shaped and double-ended bronchial blocker for one lung ventilation in thoracic surgery-a randomised controlled clinical trial. BMC Anesthesiol. 2022 Apr 2;22(1):92. doi: 10.1186/s12871-022-01637-1. PMID: 35366801; PMCID: PMC8976407.
8	Surgery	Berkel AEM, Bongers BC, Kotte H, Weltevreden P, de Jongh FHC, Eijsvogel MMM, Wymenga M, Bigirwamungu-Bargeman M, van der Palen J, van Det MJ, van Meeteren NLU, Klaase JM. Effects of Community-based Exercise Prehabilitation for Patients Scheduled for Colorectal Surgery With High Risk for Postoperative Complications: Results of a Randomized Clinical Trial. Ann Surg. 2022 Feb 1;275(2):e299-e306. doi…
9	Cardiology	Vimala LR, Eifer DA, Karimzad Y, Paul NS. Prospective Clinical Trial Comparing IV Esmolol to IV Metoprolol in CT Coronary Angiography: Effect on Hemodynamic, Technical Parameters and Cost. Can Assoc Radiol J. 2022 Feb;73(1):240-248. doi: 10.1177/08465371211023947. Epub 2021 Jul 22. PMID: 34293933.
10	Cardiology	Banovic M, Putnik S, Penicka M, Doros G, Deja MA, Kockova R, Kotrc M, Glaveckaite S, Gasparovic H, Pavlovic N, Velicki L, Salizzoni S, Wojakowski W, Van Camp G, Nikolic SD, Iung B, Bartunek J; AVATAR Trial Investigators*. Aortic Valve Replacement Versus Conservative Treatment in Asymptomatic Severe Aortic Stenosis: The AVATAR Trial. Circulation. 2022 Mar;145(9):648-658. doi: 10.1161/CIRCULATIONAH…
11	Cardiology	Gopaluni S, Smith R, Goymer D, Cahill H, Broadhurst E, Wallin E, McClure M, Chaudhry A, Jayne D. Alemtuzumab for refractory primary systemic vasculitis-a randomised controlled dose ranging clinical trial of efficacy and safety (ALEVIATE). Arthritis Res Ther. 2022 Apr 1;24(1):81. doi: 10.1186/s13075-022-02761-6. PMID: 35365179; PMCID: PMC8972754.
12	Dentistry	Solakoğlu Ö, Ofluoğlu D, Schwarzenbach H, Heydecke G, Reißmann D, Ergun S, Götz W. A 3-year prospective randomized clinical trial of alveolar bone crest response and clinical parameters through 1, 2, and 3 years of clinical function of implants placed 4 months after alveolar ridge preservation using two different allogeneic bone-grafting materials. Int J Implant Dent. 2022 Feb 1;8(1):5. doi: 10.1…
13	Dentistry	Chun JH, de Castro ACR, Oh S, Kim KH, Choi SH, Nojima LI, Nojima MDCG, Lee KJ. Skeletal and alveolar changes in conventional rapid palatal expansion (RPE) and miniscrew-assisted RPE (MARPE): a prospective randomized clinical trial using low-dose CBCT. BMC Oral Health. 2022 Apr 8;22(1):114. doi: 10.1186/s12903-022-02138-w. PMID: 35395801; PMCID: PMC8994336.
14	Surgery	Dai F, Xu YF, Yu ZH, Liu JT, Zhang ZG. Percutaneous Prodding Reduction and K-Wire Fixation Via Sinus Tarsi Approach Versus ORIF for Sanders Type III Calcaneal Fractures: A Prospective Case-Controlled Trial. J Foot Ankle Surg. 2022 Jan-Feb;61(1):37-42. doi: 10.1053/j.jfas.2021.06.005. Epub 2021 Jun 18. PMID: 34253433.
15	Obstetrics	Sharifipour P, Kheirkhah M, Rajati M, Haghani H. The effect of delivery ball and warm shower on the childbirth experience of nulliparous women: a randomized controlled clinical trial. Trials. 2022 May 12;23(1):391. doi: 10.1186/s13063-022-06358-x. PMID: 35550194; PMCID: PMC9096765.
16	Internal medicine	Tian F, Wang J, Xi X, Sun X, He M, Zhao C, Feng F, Wang H, Sun W, Mao L, Hu X, Yuan H. Efficacy and safety of short-wave diathermy treatment for moderate COVID-19 patients: a prospective, double-blind, randomized controlled clinical study. Eur J Phys Rehabil Med. 2022 Feb;58(1):137-143. doi: 10.23736/S1973-9087.21.06892-1. Epub 2021 May 27. PMID: 34042412.
17	Dentistry	Brunetto DP, Moschik CE, Dominguez-Mompell R, Jaria E, Sant'Anna EF, Moon W. Mini-implant assisted rapid palatal expansion (MARPE) effects on adult obstructive sleep apnea (OSA) and quality of life: a multi-center prospective controlled trial. Prog Orthod. 2022 Feb 1;23(1):3. doi: 10.1186/s40510-021-00397-x. PMID: 35102477; PMCID: PMC8804045.
18	Surgery	Dragosloveanu S, Popov VM, Cotor DC, Dragosloveanu C, Stoica CI. Percutaneous Chevron Osteotomy: A Prospective Randomized Controlled Trial. Medicina (Kaunas). 2022 Mar 1;58(3):359. doi: 10.3390/medicina58030359. PMID: 35334535; PMCID: PMC8948867.
19	Dermatology	Huo W, Gao YL, Wang HY, Bi GJ, Qiao S, Cai YF, Qi RQ, Yang Y, Lan J, Yao ZR, Han XP, Zhang JZ, Gao TW, Yang S, Gu H, Wu RN, Lu HG, Zeng FQ, Chen X, Qiao Y, Gao XH. Local Hyperthermia Versus Cryotherapy for Treatment of Plantar Warts: A Prospective Multi-centre Non-randomized Concurrent Controlled Clinical Trial. Acta Derm Venereol. 2022 Feb 28;102:adv00655. doi: 10.2340/actadv.v102.1082. PMID: 35…
20	Ophthalmology	Holz FG, Oleksy P, Ricci F, Kaiser PK, Kiefer J, Schmitz-Valckenberg S; COLUMBUS-AMD Study Group. Efficacy and Safety of Biosimilar FYB201 Compared with Ranibizumab in Neovascular Age-Related Macular Degeneration. Ophthalmology. 2022 Jan;129(1):54-63. doi: 10.1016/j.ophtha.2021.04.031. Epub 2021 May 3. PMID: 33957183.
21	Surgery	Armstrong DG, Galiano RD, Orgill DP, Glat PM, Carter MJ, Di Domenico LA, Reyzelman AM, Zelen CM. Multi-centre prospective randomised controlled clinical trial to evaluate a bioactive split thickness skin allograft vs standard of care in the treatment of diabetic foot ulcers. Int Wound J. 2022 May;19(4):932-944. doi: 10.1111/iwj.13759. Epub 2022 Jan 26. PMID: 35080127; PMCID: PMC9013597.
22	Internal medicine	Grabež M, Škrbić R, Stojiljković MP, Vučić V, Rudić Grujić V, Jakovljević V, Djuric DM, Suručić R, Šavikin K, Bigović D, Vasiljević N. A prospective, randomized, double-blind, placebo-controlled trial of polyphenols on the outcomes of inflammatory factors and oxidative stress in patients with type 2 diabetes mellitus. Rev Cardiovasc Med. 2022 Feb 11;23(2):57. doi: 10.31083/j.rcm2302057. PMID: 352…
23	Dentistry	Lavu V, Gutknecht N, Vasudevan A, S K B, Hilgers RD, Franzen R. Laterally closed tunnel technique with and without adjunctive photobiomodulation therapy for the management of isolated gingival recession-a randomized controlled assessor-blinded clinical trial. Lasers Med Sci. 2022 Apr;37(3):1625-1634. doi: 10.1007/s10103-021-03411-0. Epub 2021 Sep 20. PMID: 34545437; PMCID: PMC8452278.
24	Surgery	Luo ZY, Yu QP, Zeng WN, Xiao Q, Chen X, Wang HY, Zhou Z. Adductor canal block combined with local infiltration analgesia with morphine and betamethasone show superior analgesic effect than local infiltration analgesia alone for total knee arthroplasty: a prospective randomized controlled trial. BMC Musculoskelet Disord. 2022 May 19;23(1):468. doi: 10.1186/s12891-022-05388-5. PMID: 35590308; PMCID…
25	Surgery	Gould LJ, Orgill DP, Armstrong DG, Galiano RD, Glat PM, Zelen CM, DiDomenico LA, Carter MJ, Li WW. Improved healing of chronic diabetic foot wounds in a prospective randomised controlled multi-centre clinical trial with a microvascular tissue allograft. Int Wound J. 2022 May;19(4):811-825. doi: 10.1111/iwj.13679. Epub 2021 Sep 1. PMID: 34469077; PMCID: PMC9013595.
26	Clinical immunology	Chatchatee P, Nowak-Wegrzyn A, Lange L, Benjaponpitak S, Chong KW, Sangsupawanich P, van Ampting MTJ, Oude Nijhuis MM, Harthoorn LF, Langford JE, Knol J, Knipping K, Garssen J, Trendelenburg V, Pesek R, Davis CM, Muraro A, Erlewyn-Lajeunesse M, Fox AT, Michaelis LJ, Beyer K; PRESTO study team. Tolerance development in cow's milk-allergic infants receiving amino acid-based formula: A randomized co…
27	Internal medicine	Woller SC, Stevens SM, Kaplan D, Wang TF, Branch DW, Groat D, Wilson EL, Armbruster B, Aston VT, Lloyd JF, Rondina MT, Elliott CG. Apixaban compared with warfarin to prevent thrombosis in thrombotic antiphospholipid syndrome: a randomized trial. Blood Adv. 2022 Mar 22;6(6):1661-1670. doi: 10.1182/bloodadvances.2021005808. PMID: 34662890; PMCID: PMC8941474.
28	Urology	Zeng S, Liu B, Hu H, Shi J, Qian P, Zhang X, Peng K, Yang S, Huang Z, Pan T. The Function Improved of the Newly Designed Magnetic-End Ureteric Stenting Retrieval Device: A Clinical Prospective Randomized and Control Trial in a Multicenter Study. Contrast Media Mol Imaging. 2022 Apr 18;2022:4107491. doi: 10.1155/2022/4107491. PMID: 35517991; PMCID: PMC9038401.
29	Reproductive science	Siristatidis C, Stavros S, Dafopoulos K, Sergentanis T, Domali E, Drakakis P, Loutradis D. A Randomized Controlled Trial on the Efficacy and Safety of Low-Dose hCG in a Short Protocol with GnRH Agonist and Ovarian Stimulation with Recombinant FSH (rFSH) During the Follicular Phase in Infertile Women Undergoing ART. Reprod Sci. 2022 Feb;29(2):497-505. doi: 10.1007/s43032-021-00683-3. Epub 2021 Jul…
30	Cardiology	Gould J, Claridge S, Jackson T, Sieniewicz BJ, Sidhu BS, Porter B, Elliott MK, Mehta V, Niederer S, Chadwick H, Kamdar R, Adhya S, Patel N, Hamid S, Rogers D, Nicolson W, Chan CF, Whinnett Z, Murgatroyd F, Lambiase PD, Rinaldi CA. Standard care vs. TRIVEntricular pacing in Heart Failure (STRIVE HF): a prospective multicentre randomized controlled trial of triventricular pacing vs. conventional bi…
31	Dentistry	Helmy RH, Zeitoun SI, El-Habashy LM. Computer-controlled Intraligamentary local anaesthesia in extraction of mandibular primary molars: randomised controlled clinical trial. BMC Oral Health. 2022 May 20;22(1):194. doi: 10.1186/s12903-022-02194-2. PMID: 35596166; PMCID: PMC9121608.
32	Gynaecology	Zhu S, Ma X, Ding X, Gan J, Deng Y, Wang Y, Sun A. Comparative evaluation of low-level light therapy and ethinyl estradiol and desogestrel combined oral contraceptive for clinical efficacy and regulation of serum biochemical parameters in primary dysmenorrhoea: a prospective randomised multicentre trial. Lasers Med Sci. 2022 Jun;37(4):2239-2248. doi: 10.1007/s10103-021-03490-z. Epub 2022 Jan 14. …
33	Ophthalmology	Wang M, Cui C, Sui Y, Yu SA, Ma JX, Fu AC. Effect of 0.02% and 0.01% atropine on astigmatism: a two-year clinical trial. BMC Ophthalmol. 2022 Apr 7;22(1):161. doi: 10.1186/s12886-022-02385-z. PMID: 35392841; PMCID: PMC8991778.
34	Internal medicine	Sirisunhirun P, Bandidniyamanon W, Jrerattakon Y, Muangsomboon K, Pramyothin P, Nimanong S, Tanwandee T, Charatcharoenwitthaya P, Chainuvati S, Chotiyaputta W. Effect of a 12-week home-based exercise training program on aerobic capacity, muscle mass, liver and spleen stiffness, and quality of life in cirrhotic patients: a randomized controlled clinical trial. BMC Gastroenterol. 2022 Feb 14;22(1):…
35	Anaesthesiology	Rousseaux F, Dardenne N, Massion PB, Ledoux D, Bicego A, Donneau AF, Faymonville ME, Nyssen AS, Vanhaudenhuyse A. Virtual reality and hypnosis for anxiety and pain management in intensive care units: A prospective randomised trial among cardiac surgery patients. Eur J Anaesthesiol. 2022 Jan 1;39(1):58-66. doi: 10.1097/EJA.0000000000001633. PMID: 34783683; PMCID: PMC8654253.
36	Anaesthesiology	Aygun H, Kiziloglu I, Ozturk NK, Ocal H, Inal A, Kutlucan L, Gonullu E, Tulgar S. Use of ultrasound guided single shot costotransverse block (intertransverse process) in breast cancer surgery: a prospective, randomized, assessor blinded, controlled clinical trial. BMC Anesthesiol. 2022 Apr 18;22(1):110. doi: 10.1186/s12871-022-01651-3. PMID: 35436844; PMCID: PMC9014597.
37	Surgery	Spirig JM, Hüllner M, Cornaz F, Betz M, Wanivenhaus F, Hofbauer M, Johayem A, Kaufmann PA, Farshad M. [18F]-sodium fluoride PET/MR for painful lumbar facet joint degeneration - a randomized controlled clinical trial. Spine J. 2022 May;22(5):769-775. doi: 10.1016/j.spinee.2021.11.014. Epub 2021 Nov 27. PMID: 34848344.
38	Internal medicine	Teysseire F, Bordier V, Budzinska A, Weltens N, Rehfeld JF, Holst JJ, Hartmann B, Beglinger C, Van Oudenhove L, Wölnerhanssen BK, Meyer-Gerspach AC. The Role of D-allulose and Erythritol on the Activity of the Gut Sweet Taste Receptor and Gastrointestinal Satiation Hormone Release in Humans: A Randomized, Controlled Trial. J Nutr. 2022 May 5;152(5):1228-1238. doi: 10.1093/jn/nxac026. PMID: 351350…
39	Clinical nutrition	O'Callaghan KM, Shanta SS, Fariha F, Harrington J, Mahmud AA, Emdin AL, Gernand AD, Ahmed T, Abrams SA, Moore DR, Roth DE. Effect of maternal prenatal and postpartum vitamin D supplementation on offspring bone mass and muscle strength in early childhood: follow-up of a randomized controlled trial. Am J Clin Nutr. 2022 Mar 4;115(3):770-780. doi: 10.1093/ajcn/nqab396. PMID: 34849536; PMCID: PMC8895…
40	Oncology	Hochberg J, Basso J, Shi Q, Klejmont L, Flower A, Bortfeld K, Harrison L, van de Ven C, Moorthy C, Islam H, Gerard P, Voss S, Cairo MS. Risk-adapted chemoimmunotherapy using brentuximab vedotin and rituximab in children, adolescents, and young adults with newly diagnosed Hodgkin's lymphoma: a phase II, non-randomized controlled trial. J Immunother Cancer. 2022 May;10(5):e004445. doi: 10.1136/jitc…
41	Surgery	Hemmingsson O, Binnermark F, Odensten C, Rutegård M, Franklin KA, Haapamäki MM. Excision and suture in the midline versus Karydakis flap surgery for pilonidal sinus: randomized clinical trial. BJS Open. 2022 Mar 8;6(2):zrac007. doi: 10.1093/bjsopen/zrac007. PMID: 35289848; PMCID: PMC8932511.
42	Internal medicine	Rebelatto CLK, Senegaglia AC, Franck CL, Daga DR, Shigunov P, Stimamiglio MA, Marsaro DB, Schaidt B, Micosky A, de Azambuja AP, Leitão CA, Petterle RR, Jamur VR, Vaz IM, Mallmann AP, Carraro Junior H, Ditzel E, Brofman PRS, Correa A. Safety and long-term improvement of mesenchymal stromal cell infusion in critically COVID-19 patients: a randomized clinical trial. Stem Cell Res Ther. 2022 Mar 21;1…
43	Neurology	Elliott JE, McBride AA, Balba NM, Thomas SV, Pattinson CL, Morasco BJ, Wilkerson A, Gill JM, Lim MM. Feasibility and preliminary efficacy for morning bright light therapy to improve sleep and plasma biomarkers in US Veterans with TBI. A prospective, open-label, single-arm trial. PLoS One. 2022 Apr 14;17(4):e0262955. doi: 10.1371/journal.pone.0262955. PMID: 35421086; PMCID: PMC9009710.
44	Anaesthesiology	Nickl R, Vicent O, Müller T, Osmers A, Schubert K, Koch T, Richter T. Impact of self-coiling catheters for continuous popliteal sciatic block on postoperative pain level and dislocation rate: a randomized controlled trial. BMC Anesthesiol. 2022 May 24;22(1):159. doi: 10.1186/s12871-022-01700-x. PMID: 35610566; PMCID: PMC9128226.
45	Anaesthesiology	Niu J, Hu R, Yang N, He Y, Sun H, Ning R, Yu J. Effect of intratracheal dexmedetomidine combined with ropivacaine on postoperative sore throat: a prospective randomised double-blinded controlled trial. BMC Anesthesiol. 2022 May 14;22(1):144. doi: 10.1186/s12871-022-01694-6. PMID: 35568822; PMCID: PMC9107121.
[Section 2] Generation of random sequence for appraisal tool rating per rater
	Rater codes:
FK	1
US	2
RS	3
KV	4
Sequence randomisation:
(ACCESSED 06.06.2022)
Block size: 2
Actual list length: 8
https://www.sealedenvelope.com/simple-randomiser/v1/lists
Seed: 240552981749208
block identifier, block size, sequence within block, treatment
Rank	Random A/B sequence	A= CQS-1/B = CQS-2
1	1, 2, 1, Group B	CQS-2
2	1, 2, 2, Group A	CQS-1
3	2, 2, 1, Group A	CQS-1
4	2, 2, 2, Group B	CQS-2
5	3, 2, 1, Group A	CQS-1
6	3, 2, 2, Group B	CQS-2
7	4, 2, 1, Group B	CQS-2
8	4, 2, 2, Group A	CQS-1
Dates of sending and receipt of templates:
Rater code	Rank	Template	Sent	Recived
1	1	CQS-2	01.07.22	25.07.22
	2	CQS-1	08.08.22	06.09.22
2	3	CQS-1	01.07.22	14.07.22
	4	CQS-2	28.07.22	29.07.22
3	5	CQS-1	01.07.22	08.07.22
	6	CQS-2	22.07.22	04.08.22
4	7	CQS-2	01.07.22	19.08.22
	8	CQS-1	02.09.22	05.10.22
[Section 3] Data collected
[4.1] CQS-1
Rater	FK					KV						RS						US
Article	Criterion*					Article	Criterion*					Article	Criterion*					Article	Criterion*
Nr	I	II	III			Nr	I	II	III			Nr	I	II	III			Nr	I	II	III
				Total						Total						Total						Total
	Yes= 1/ No=0	Yes= 1/ No=0	Yes= 1/ No=0	Score			Yes= 1/ No=0	Yes= 1/ No=0	Yes= 1/ No=0	Score			Yes= 1/ No=0	Yes= 1/ No=0	Yes= 1/ No=0	Score			Yes= 1/ No=0	Yes= 1/ No=0	Yes= 1/ No=0	Score
1	1	1	0	0		1	1	0	0	0		1	1	1	0	0		1	1	0	0	0
2	1	0	0	0		2	1	0	0	0		2	1	0	0	0		2	1	0	0	0
3	1	1	0	0		3	1	1	0	0		3	1	1	0	0		3	1	1	0	0
4	1	1	0	0		4	1	1	0	0		4	1	1	0	0		4	1	1	0	0
5	1	1	0	0		5	1	1	0	0		5	1	1	0	0		5	1	1	0	0
6	1	0	1	0		6	1	1	0	0		6	1	0	0	0		6	1	1	1	1
7	1	1	0	0		7	1	1	0	0		7	1	1	0	0		7	1	1	0	0
8	1	0	0	0		8	1	1	0	0		8	1	1	0	0		8	1	1	0	0
9	1	0	0	0		9	1	1	0	0		9	1	0	0	0		9	1	1	0	0
10	1	0	0	0		10	1	1	0	0		10	1	1	0	0		10	1	1	0	0
11	1	0	0	0		11	1	0	0	0		11	1	0	0	0		11	1	0	0	0
12	1	1	0	0		12	1	1	0	0		12	1	1	0	0		12	1	1	0	0
13	1	1	0	0		13	1	0	0	0		13	1	0	0	0		13	1	1	0	0
14	1	1	0	0		14	1	0	0	0		14	1	0	0	0		14	1	1	0	0
15	1	1	0	0		15	1	1	0	0		15	1	0	0	0		15	1	1	0	0
16	1	1	0	0		16	1	1	0	0		16	1	0	0	0		16	1	1	0	0
17	0	0	0	0		17	0	0	0	0		17	0	0	0	0		17	0	0	0	0
18	0	1	0	0		18	1	1	0	0		18	1	1	0	0		18	1	1	0	0
19	0	0	1	0		19	0	0	1	0		19	0	0	1	0		19	0	0	1	0
20	1	0	1	0		20	1	1	1	1		20	1	0	1	0		20	1	1	1	1
21	1	1	0	0		21	1	1	0	0		21	1	1	0	0		21	1	1	0	0
22	1	0	0	0		22	1	1	0	0		22	1	0	0	0		22	1	1	0	0
23	1	1	0	0		23	1	1	0	0		23	1	1	0	0		23	1	1	0	0
24	1	0	0	0		24	1	1	0	0		24	1	1	0	0		24	1	1	0	0
25	1	0	0	0		25	1	1	0	0		25	1	1	0	0		25	1	1	0	0
26	1	0	0	0		26	1	1	0	0		26	1	1	0	0		26	1	1	0	0
27	0	0	0	0		27	1	1	0	0		27	1	1	0	0		27	1	1	0	0
28	0	0	1	0		28	1	0	1	0		28	1	0	0	0		28	1	1	1	1
29	0	1	0	0		29	1	0	0	0		29	1	1	0	0		29	1	1	0	0
30	0	0	0	0		30	1	0	0	0		30	1	0	0	0		30	1	1	0	0
31	1	1	0	0		31	1	0	0	0		31	1	1	0	0		31	1	1	0	0
32	1	0	0	0		32	1	0	0	0		32	1	0	0	0		32	1	1	0	0
33	0	0	1	0		33	1	0	0	0		33	1	0	0	0		33	1	1	1	1
34	0	0	0	0		34	1	1	0	0		34	1	0	0	0		34	1	1	0	0
35	0	0	0	0		35	1	0	0	0		35	1	0	0	0		35	1	1	0	0
36	0	0	0	0		36	1	1	0	0		36	1	1	0	0		36	1	1	0	0
37	0	0	0	0		37	1	0	0	0		37	1	0	0	0		37	1	1	0	0
38	0	0	0	0		38	1	1	0	0		38	1	0	0	0		38	1	0	0	0
39	0	0	1	0		39	1	0	0	0		39	1	0	0	0		39	1	1	1	1
40	0	0	0	0		40	0	0	0	0		40	0	0	0	0		40	0	0	0	0
41	1	1	0	0		41	1	0	0	0		41	1	0	0	0		41	1	1	0	0
42	1	0	0	0		42	1	1	0	0		42	1	1	0	0		42	1	1	0	0
43	0	0	0	0		43	0	0	0	0		43	0	0	0	0		43	0	0	0	0
44	0	1	0	0		44	1	1	0	0		44	1	1	0	0		44	1	1	0	0
45	1	1	1	1		45	1	1	0	0		45	1	1	0	0		45	1	1	1	1
[4.2] CQS-2
Rater	FK							KV							RS							US
Article	Criterion*				Total		Article	Criterion*				Total		Article	Criterion*				Total		Article	Criterion*				Total
Nr	I	II	III	IV	Score		Nr	I	II	III	IV	Score		Nr	I	II	III	IV	Score		Nr	I	II	III	IV	Score
1	1	0	0	0	0		1	1	0	0	0	0		1	1	0	0	0	0		1	1	1	0	1	0
2	1	0	0	0	0		2	1	0	0	0	0		2	1	0	0	0	0		2	1	0	0	0	0
3	1	0	0	0	0		3	1	0	0	0	0		3	1	0	0	0	0		3	1	0	0	0	0
4	1	0	1	0	0		4	1	1	1	0	0		4	1	0	1	0	0		4	1	0	1	0	0
5	1	0	1	0	0		5	1	1	1	0	0		5	1	0	1	0	0		5	1	0	1	0	0
6	1	0	1	1	0		6	1	0	1	1	0		6	0	0	0	1	0		6	1	0	1	1	0
7	1	0	0	0	0		7	1	0	1	0	0		7	0	0	0	0	0		7	1	0	1	0	0
8	1	0	1	0	0		8	1	0	0	0	0		8	1	0	0	0	0		8	1	0	0	0	0
9	1	0	1	0	0		9	1	0	1	0	0		9	1	0	1	0	0		9	1	0	0	0	0
10	1	0	0	0	0		10	1	0	1	0	0		10	1	0	0	0	0		10	1	0	0	0	0
11	1	0	0	0	0		11	1	0	0	0	0		11	0	0	0	0	0		11	1	0	0	0	0
12	1	0	1	0	0		12	1	1	0	0	0		12	1	0	1	0	0		12	1	0	0	0	0
13	1	0	0	0	0		13	1	0	0	0	0		13	1	0	0	0	0		13	1	0	0	0	0
14	1	0	0	0	0		14	1	0	0	0	0		14	1	0	0	0	0		14	1	0	0	0	0
15	1	0	1	0	0		15	1	0	0	0	0		15	1	0	0	0	0		15	1	0	0	0	0
16	1	0	1	0	0		16	1	0	1	0	0		16	1	0	1	0	0		16	1	0	1	0	0
17	0	0	0	0	0		17	0	0	0	0	0		17	1	0	0	0	0		17	0	0	0	0	0
18	1	0	0	0	0		18	1	0	0	0	0		18	1	0	0	0	0		18	1	0	0	0	0
19	0	0	0	1	0		19	0	0	0	1	0		19	0	0	0	1	0		19	0	0	0	1	0
20	1	0	1	1	0		20	1	0	0	1	0		20	1	0	0	0	0		20	1	0	1	1	0
21	1	0	0	0	0		21	1	0	0	0	0		21	1	0	1	0	0		21	1	0	0	0	0
22	1	0	1	0	0		22	1	0	1	0	0		22	1	0	1	0	0		22	1	0	1	0	0
23	1	0	1	0	0		23	1	1	1	0	0		23	1	1	1	0	0		23	1	0	1	0	0
24	1	0	0	0	0		24	1	0	1	0	0		24	1	1	1	0	0		24	1	0	1	0	0
25	1	0	0	0	0		25	1	0	0	0	0		25	1	0	1	0	0		25	1	0	0	0	0
26	1	0	1	0	0		26	1	1	1	0	0		26	1	0	1	0	0		26	1	0	1	0	0
27	1	0	0	0	0		27	1	0	0	0	0		27	1	0	1	0	0		27	1	0	0	0	0
28	1	0	0	1	0		28	1	0	0	1	0		28	1	0	0	1	0		28	1	0	0	1	0
29	1	0	1	0	0		29	1	1	1	0	0		29	1	0	1	0	0		29	1	0	0	0	0
30	1	0	0	0	0		30	1	0	0	0	0		30	1	0	0	0	0		30	1	0	0	0	0
31	1	0	0	0	0		31	1	1	0	0	0		31	1	1	0	0	0		31	1	0	0	0	0
32	1	0	0	0	0		32	1	0	0	0	0		32	1	0	0	0	0		32	1	0	0	0	0
33	1	0	1	1	0		33	0	0	0	1	0		33	1	0	1	0	0		33	1	0	0	1	0
34	1	0	1	0	0		34	1	0	0	0	0		34	1	0	0	0	0		34	1	0	0	0	0
35	1	0	0	1	0		35	1	0	0	0	0		35	1	0	0	0	0		35	1	0	0	0	0
36	1	0	1	0	0		36	1	0	1	0	0		36	1	0	1	0	0		36	1	0	0	0	0
37	1	0	0	0	0		37	1	0	0	0	0		37	1	0	0	0	0		37	1	0	0	0	0
38	1	0	1	0	0		38	1	0	1	0	0		38	1	0	0	0	0		38	1	0	0	0	0
39	1	0	1	0	0		39	1	1	0	1	0		39	1	0	0	1	0		39	1	0	0	1	0
40	0	0	0	0	0		40	0	0	0	0	0		40	0	0	0	0	0		40	0	0	0	0	0
41	1	0	0	0	0		41	1	0	0	0	0		41	1	1	0	0	0		41	1	0	0	0	0
42	1	0	1	0	0		42	1	1	1	0	0		42	1	0	1	0	0		42	1	0	0	0	0
43	0	0	0	0	0		43	0	0	0	0	0		43	0	0	0	0	0		43	0	0	0	0	0
44	1	0	1	0	0		44	1	0	1	0	0		44	1	0	1	0	0		44	1	0	1	0	0
45	1	0	1	1	0		45	1	1	1	0	0		45	1	1	1	0	0		45	1	0	1	0	0
